# Supplementary material
Source: PubMed Central journal article supplement (PMC2680992)
Supplement: mmc1.pdf [file mmc1.pdf]

**Supplemental Data**

**Ovaries and Female Phenotype in a Girl**

**with 46,XY Karyotype and Mutations in the *Cbx2* Gene**

Anna Biason-Lauber, Daniel Konrad, Monika Meyer, Carine deBeaufort, and Eugen J. Schoenle

**Figure 1 :** **A:** qualitative end point reverse transcriptase PCR of RNA extracted from NT2-D1 cells that were either non transfected (control,) transfected with *CBX2* alone, *CBX2* in combination with two siRNAs (*CBX2* + siRNAs) or their scrambles (*CBX2* + scrambles). Whereas NT2-D1 cells do not express endogenous *CBX2*, overexpression of *CBX2* induces an increase in mRNA of *CBX2* itself (q.e.d.) and of other genes involved in sexual differentiation, *SRY*, *SF1* and *SOX9*. siRNA treatment significantly down-regulated the expression of these genes and of *CBX2*, whereas treatment with scrambles does not. *GAPDH* was used as internal control. **B:** Western blot analysis of *CBX2* protein in extracts of NT2-D1, transfected and treated as in A. An anti-M33/*CBX2* commercially available antibody ( $\alpha$ M33) was used. As for the mRNA, *CBX2* protein expression is also significantly reduced under siRNA treatment, but not after scrambles transfection. Beta Actin was used as internal control. **C:** quantitative Real-Time PCR of mRNA extracted from NT2-D1 treated as in A. The results are the mean  $\pm$  SD of three measurements and are expressed as relative to control =1. The results mirror those of the RT-PCR experiments, i.e. siRNA treatment reduces *CBX2* expression to almost baseline. *SF1*, *SRY* and *SOX9* expression was also downregulated by siRNA treatment, but not by transfection of scrambles. 1-way ANOVA:  $p < 0.0001$  for *CBX2*, *SRY* and *SF1*;  $p < 0.0343$  for *SOX9*. t-test: *CBX2* : control vs *CBX2* (and *CBX2* + scrambles)  $p < 0.0001$ , *CBX2* (and *CBX2* + scrambles) vs *CBX2*+ siRNAs  $p < 0.0001$ ; *SRY*: control vs *CBX2* (and *CBX2* + scrambles)  $p < 0.0001$ , *CBX2* (and *CBX2* + scrambles) vs *CBX2*+ siRNAs  $p = 0.0025$ ; *SF1* : control vs *CBX2* (and *CBX2* + scrambles)  $p < 0.0001$ , *CBX2* (and *CBX2* + scrambles) vs *CBX2*+ siRNAs  $p < 0.0001$ ; *SOX9* : control vs *CBX2* (and *CBX2* + scrambles)  $p = 0.012$ , *CBX2* (and *CBX2* + scrambles) vs *CBX2*+ siRNAs  $p = 0.05$ .

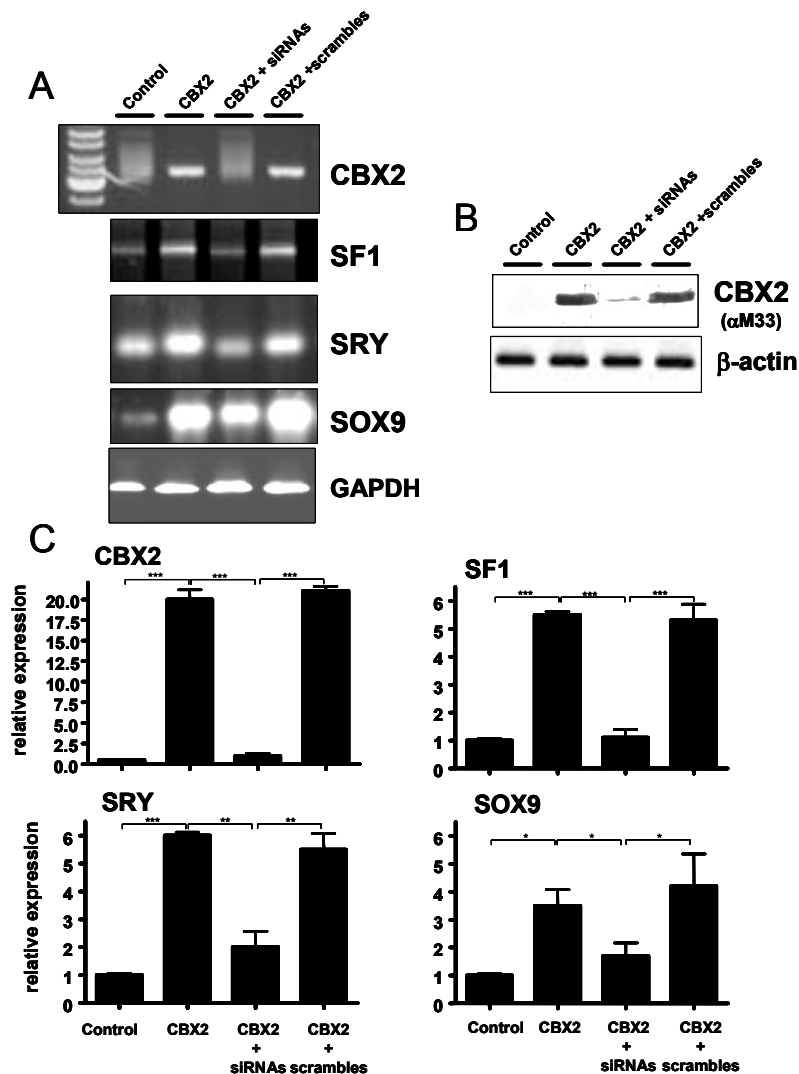

**Table S1: CBX2 Primers**

AMPLIFICATION

| Oligo designation              | Isoform | Exon      | Sequence                                     | Size |
|--------------------------------|---------|-----------|----------------------------------------------|------|
| CBX2-ex1-2-5'<br>CBX2-ex1-2-3' | 1 & 2   | 1-2       | CCCCAGGCCCGAAGTCCCTA<br>GCACCCGCGGGCGTGTAAC  | 770  |
| CBX2-ex3-5'<br>CBX2-ex3-3'     | 1 & 2   | 3         | TTGGGTCTGAGGTAGAGTG<br>GATGGCCCTGGACACAATCT  | 414  |
| CBX2-ex4.1/2-5'                | 1 & 2   | 4         | TGATCTCTGCCTTGGGTATT                         | 216  |
| CBX2-ex4.1-3'                  | 1       |           | GTCAGCCCTGCCTTTCGTGG                         |      |
| CBX2-ex4.2-3'                  | 2       |           | TGACAGGACAGTCCCGAGAA                         | 817  |
| CBX2-ex5-1-5'<br>CBX2-ex5-1-3' | 1       | 5<br>PCR1 | GAAACAGGGCTCCACTATGT<br>GATCCTTCCGGCGGTCTTC  | 427  |
| CBX2-ex5-2-5'<br>CBX2-ex5-2-3' |         | PCR2      | GCAACCCGAAGACCCGTGAG<br>GGCATGCCATTCTTGACACT | 575  |
| CBX2-ex5-3-5'<br>CBX2-ex5-3-3' |         | PCR3      | GCAGAAAGTGGGGAACACAG<br>TGCCCTTGACACAGTCCCTC | 347  |
| CBX2-ex5-4-5'<br>CBX2-ex5-4-3' |         | PCR4      | GTGTCAAGGGCAGTGCTACC<br>TTGGGCTGGGAGTCACTTAG | 391  |

**Table S2: Real-Time PCR primers:**

| TARGET | PRIMERS SEQUENCE                                               | SIZE |
|--------|----------------------------------------------------------------|------|
| SF1    | DIR: GCACCCACAGTCGCCACCGTCCC<br>REV. AGCTCGTCCAGGTCCCTCGTCGTA  | 154  |
| WNT4   | DIR: ACCTGGAAGTCATGGACTCGGTG<br>REV: CCGCCTCCCGAGTCCCTTGCGTC   | 150  |
| SRY    | DIR: TACGGGCCTTTACCTGGTTACCTC<br>REV: CTGGTGTGCTACTTACGCAAGTAC | 302  |
| WT1    | DIR GGTGTCTTCAGAGGCATTCAGGA<br>REV:GCAGCCTGGGTAAGCACACAT       | 151  |
| SOX9   | DIR: GGCTACGACTGGACGCTGGT<br>REV: TGCTGAGCTCGGCGTTGTGC         | 163  |
| DAX1   | DIR: GTACCAAGGAGTACGCCTACCTC<br>REV: CATGGGCCCCTTGGTGCGTCATC   | 150  |
| CBX2.1 | DIR. AAGAGGGACTGTGTCAAGGG<br>REV: GAGTCGGGGTCCGAGTCCGA         | 139  |

Table S3: Chromatin Immunoprecipitation primers

|                           |     |                              |
|---------------------------|-----|------------------------------|
| <b>Fragment 1</b>         | dir | actggcctgtcctgactctactcc     |
|                           | rev | ttggttggtgtttgtgttcatttacgtg |
| 324 bp (-465/-85)         |     |                              |
| <b>Fragment 2</b>         | dir | caacaagaacaccagggcg          |
|                           | rev | atacacagcaagactcagaga        |
| 651 bp (-85/+ 540)        |     |                              |
| <b>Fragment 3</b>         | dir | ccgtgtgtctgtctccggcatcc      |
|                           | rev | gtggatgcctggccagagaca        |
| 171 bp (+239/410)         |     |                              |
| <b>Fragment 4</b>         | dir | acaatcttggtcactgcaacctctgc   |
|                           | rev | ggaggcaaggccatggcgacttgac    |
| 767 bp (-1232/-465)       |     |                              |
| <b>Fragment 5</b>         | dir | ggggtccgcgcgggggagc          |
|                           | rev | gaggagctctgccgaccctgt        |
| 920 bp (exon 2 8761-9681) |     |                              |
